# Supplementary material for: Multi-level data assimilation for simplified ocean models
Source: Copernicus journal article supplement (doi:10.5194/npg-2023-27), 2024-01-04
Supplement: Supplementary file [file npg-2023-27-RC1-supplement.pdf]

### **General comments:**

This study applied a multi-level Monte Carlo (MLMC)-based Ensemble Kalman filter (EnKF) to a shallow-water model, comparing it with a widely used single-level EnKF. The objective of this study is to demonstrate the applicability of the MLMC-based EnKF to practical systems, using the MLMC theory to replace a part of the original high-resolution ensemble forecasts with low-resolution forecasts, thereby reducing computational costs.

However, several significant issues are identified in the manuscript:

#### **1. Assimilation of Unavailable Observations:**

This paper assimilates unavailable observations of zonal and meridional momentum.

#### **2. Inconsistent Localization**

$P^f H^T$  localization is applied only to the first part of the Kalman gain, despite the presence of  $H P^f H^T$  in the inversed part.

#### **3. Challenges in Practical Implementation**

Formulation based on the perturbed observation method results in an exceedingly large size matrix of the Kalman gain, posing challenges for practical system implementation and difficulties in parallel computation.

#### **4. Numerical Instabilities and Negative Eigenvalues**

Negative eigenvalues lead to numerical instabilities when applying eigenvalue decomposition to the inversed matrix in the Kalman gain. The likelihood of implementing the MLMC-based EnKF successfully is questionable.

#### **5. Unreasonable System Settings**

Because of the chosen system settings, such as the absence of stochastic external forcing, filter divergence is likely to occur as seen in decreasing the ensemble spread kept over the assimilation period. Therefore, the experimental period of 10 days was too short to conclude. In addition, there are other numerous issues such as inconsistency between the observation errors used for generating observations and the prescribed observation error covariance matrix.

#### **6. Lack of Statistical Tests**

The lack of statistical tests in the sensitivity experiments raises questions to significantly identify differences between the single- and multi-level Monte Carlo methods.

### **7. Language and Presentation Issues**

The manuscript contains numerous instances of ambiguous expressions, typos, incorrect grammar, and a lack of definitions for words and mathematical symbols. It appears that co-authors may not have conducted a thorough review of the manuscript.

From the identified issues, I concluded that the paper falls short of meeting the standards expected for publication in international journals.

### **Specific comments:**

[Abstract]

The authors have addressed practical challenges in implementing a multi-level Monte Carlo (MLMC)-based data assimilation method with a simplified shallow-water model to assimilate ocean zonal and meridional momentum. However, it should be noted that operational ocean data assimilation systems typically do not assimilate momentum or ocean current data (Balmaseda et al. 2015 and Martin et al. 2015). Consequently, it is recommended to modify the experimental settings and/or descriptions in this paper to better align with the current practices in operational ocean data assimilation.

The authors frequently employ expressions such as 'apply or incorporate observations to models' throughout the manuscript. However, it is important to note that data assimilation combines models and observations using dynamical systems and statistical theories, and therefore observations are assimilated in data assimilation systems. Therefore, it would be more appropriate to use terms such as 'assimilate observations in data assimilation systems' to accurately represent the underlying process. Please carefully revise the relevant descriptions throughout the manuscript to ensure consistency with the principles of data assimilation.

[Section 1]

First paragraph: It would be better to start by explaining what a single-level Monte Carlo (SLMC) method is and then move to the MLMC because the SLMC is a common data assimilation method. In addition, the authors should give simple and easy expressions to understand the MLMC. To me, at least the first paragraph in Section 1 is hard to read.

The first paragraph in Section 1 could benefit from a clearer structure by initially introducing the single-level Monte Carlo (SLMC) method, a widely used data assimilation approach, before transitioning to the multi-level Monte Carlo (MLMC) method. This approach would help readers build a more solid understanding. Furthermore, the authors are encouraged to provide simplified and easily understandable expressions for the MLMC method. This paragraph seems challenging to comprehend, and efforts should be made to enhance its readability.

L43-45: The optimal ensemble size would be infinity to remove spurious correlations caused by sampling errors (e.g., Kondo and Miyoshi 2016). It is crucial to explicitly mention what specific aspect is being optimized for in this context. The authors should

provide clarification on the optimization objective to enhance the understanding of the readers.

L44-45: The Kalman filter and ensemble Kalman filter are traditionally formulated under the assumption of no correlation between forecast and observation errors. The authors mentioned “correlations with observations” without specifying the details. It is essential to elaborate on the nature and specifics of these correlations with observations for a clearer understanding.

[Subsection 1.1]

L68-70: The authors' explanations seem inconsistent because variational methods are typically formulated to maximize the probabilistic density function (PDF) derived from backgrounds, observations, and these errors. To ensure clarity and coherence in the manuscript, it is recommended that the authors revisit and carefully align their explanations to maintain consistency with the fundamental principles of variational methods.

[Subsection 2.1]

Eq. (1): Since  $\delta x$  is used to represent ensemble perturbations and first-order terms in the Taylor expansion, it is suggested that model errors are represented by alternative variables such as  $q$  and  $\eta$  rather than  $\delta x$ .

L105-106: In addition to the “missing or unresolved physics in the model” as mentioned by the authors, it is essential to acknowledge that model errors can arise from various other factors. Therefore, the current description of model errors appears to be incomplete. It is recommended that the authors provide a more comprehensive discussion.

L107-108

The statement that 'the state  $x(t)$  will therefore represent grid cell averages of physical variables for all grid cells in the domain at time  $t$ ' suggests an interpretation of  $x(t)$  as the average value over the entire domain. However, this may lead to confusion. It is recommended to clarify that  $x(t)$  represents the grid cell averages rather than a single average value for the entire domain at time  $t$ .

L110 and others: According to the formatting guidelines on the website (<https://www.nonlinear-processes-in-geophysics.net/submission.html#math>), it is

recommended to use 'Eq.' or 'Equation' before the formula number. Therefore, it is necessary to revise the manuscript to ensure consistency with the specified formatting rules.

Second paragraph: If regional high-resolution models have smaller dimensions than global coarse models, the computational costs of fine models would be smaller. Therefore, it is recommended to carefully reconsider and revise the explanations in the second paragraph.

L120: Please explain the definitions of “complete” and “incomplete” observations.

L120–121: The expression of “the true state ... denoted  $x_{true}$ ” and “The model for the observation” are incorrectly phrased. Please clarify and rephrase these statements for accuracy.

L122-123: In Eq. (3), the bold font used for  $H$  suggests that  $H$  is a linear observation matrix. To avoid confusion, it is crucial to use precise expressions to distinguish between a matrix and a function.

L124-125: Please summarize the explanation of  $H$  in the previous sentence.

The last paragraph: Please consider removing the last paragraph because its content would be considered common knowledge among researchers in the data assimilation field.

L142-143: Please describe specifically, especially the latter half of the sentence.

L145: It should be clarified that  $\overline{y}$  represents the ensemble mean in the observation space, not observations.

L159-160 and others:  $HP^fH^T$  is not 'the cross covariance ... predicted observations,' but a forecast error covariance matrix in the observation space ( $P^f$ : forecast error covariance matrix in the model space). Additionally, the authors' expression for  $HP^fH^T+R$  is incorrect and requires appropriate revision.

L160 and all formulations: Considering operational ocean data assimilation systems with observation numbers exceeding  $10^5$ – $10^6$  per day, methods such as the reduced-order

Kalman filter (Fukumori et al. 1995) and local ensemble transform Kalman filter (LETKF; Hunt et al. 2007) have been proposed to reduce matrix sizes. The size of the Kalman gain as based on the perturbed observations is impractically large with dimensions proportional to the model size times observation size. Therefore, to enable the implementation of an MLMC-based EnKF with practical systems, I recommend exploring a formulation based on the LETKF rather than perturbed observation methods.

L163: If superscript a is used for analyses, it would be better to add superscript f for forecasts.

L172: Please define level 0.

L180: “merging ... each”. Did the authors average the values at west-, east-, north-, and south-side grids? Please clarify this procedure.

The authors frequently use characters without proper definitions. This is not permissible in scientific papers. It is imperative for the authors to meticulously review the manuscript and ensure that all symbols and characters are clearly defined just after the characters first appear.

- $N^1$  in Eq. (13).
- $\|\dot{\Psi}\|_2$  in L217
- scalar  $w$  in L364
- subscripts  $t, x, y$  in Eq. (24)
- $\Psi^{\alpha \sin}$  and  $\Psi^{\alpha \cos}$  in Eq. (26).
- $I_2$  in L457
- $c^L$  in L499
- $N_d$  in L607
- (a) in L618 and corresponding (b) and (c) etc.

L214: Please provide clarification on the statistical accuracy represented by  $\tau^2$ . Is it meant to denote RMSE (Root Mean Square Error) or other specific statistical values?

L217: Could you please provide a clearer definition for the L2-norm, specifically in terms of whether it involves summing up the squared state vector over time?

L219: While it is commonly known that larger ensemble sizes can reduce sampling errors caused by ensemble approximation, the authors described that the use of finer models can also lead to a reduction in sampling errors. It is crucial to provide a theoretical foundation for this description because it appears to deviate from the conventional understanding.

L238: Please clarify the meaning of “optimal”.

Eqs. (19a) and (19b): Since  $K^{ML}$  represents the Kalman gain for the finest system, there are inconsistencies in dimensions between the  $x^0$  and analysis increments.

L265: Kalman gain is calculated from  $P^f$  and  $R$ , and the description of “All these ... Kalman gain matrix” is inconsistent.

[Subsection 3.1]

Figure 2: Please modify the expression to “relative A to B” in the caption of Fig. 2b. It is unclear what computation times are compared. In addition, at the resolution of  $1024^2$ , it seems that some computations might slightly exceed the theoretical limit. It is necessary to investigate and confirm this.

L304 and others: The use of expressions such as 'we see' and 'we observe' to describe the results introduces subjectivity. To maintain objectivity, it is recommended to remove or replace these expressions throughout the manuscript.

L307 and others: The use of 'very' is not suitable for scientific papers, as it introduces subjectivity without objectively quantifying the degree. It is suggested to replace or eliminate 'very' to enhance precision and objectivity.

[Subsection 3.1.2]

When referring to 'the mean,' please specify whether it denotes the ensemble mean, spatial mean, temporal mean, or another specific type of mean to avoid ambiguity.

Eqs. (20) and (21): If the equations are meant to indicate definitions, please use  $\forall$ equiv rather than  $\forall$ equal.

L314: If the authors conducted a twin experiment, it is recommended to use the terminology 'twin experiment' to accurately describe what kinds of experiments the

authors performed.

L345: Please provide clarification on the term 'different stochastic truths' to ensure a more precise understanding.

[subsection 3.1.3]

A more specific description of the derivation of Eq. (22) is necessary, as it is crucial for determining the ensemble size for each level. Providing additional details on the process would enhance the clarity and understanding of the manuscript.

[subsection 3.2]

L357–358 and others: The term 'performance' is used in the context of computation, whereas 'accuracy' is employed to describe the closeness of forecasts and analyses to true values. It is important to maintain consistency in the use of these terms throughout the manuscript to ensure clarity in communication.

L364: Please clarify the scalar  $w$ . Generally, the Gaspari and Cohn or Gaussian functions are used for the localization.

In the last paragraph, the authors implemented the localization by replacing  $P^f H^T$  with  $w \odot P^f H^T$ . However,  $P^f H^T$  appears in two parts in the Kalman gain, and both should be localized. An alternative option is to implement  $K$ -localization by replacing  $K$  with  $w \odot K$ .  $K$ -localization would offer a simpler and more consistent approach compared with the localization the authors applied.

Furthermore, the formulation of the ETKF and the implementation of the  $R$ -localization with the ETKF enable easy parallel computation. It would be challenging to implement parallel computation with the perturbed observation-based EnKF and the  $P^f H^T$  localization. It seems that the authors did not apply parallel computation to EnKF, but parallel computation is an essential factor in constructing practical data assimilation systems.

[Subsection 3.3]

L375–379: The descriptions in L375-379 are not clear to me. Please provide a more careful and specific explanation for better comprehension.

When error covariances (i.e., off-diagonal elements) in matrices  $P^f$  and  $R$  are substantial,



it is known that negative eigenvalues can be estimated when applying eigenvalue decomposition to  $(HP^T + R)^{-1}$ . As a result, studies on observation error correlations (i.e., off-diagonal elements of  $R$ ) often adopt preconditioning techniques to mitigate numerical instabilities (e.g., Weston et al. 2014; Tebeart et al. 2020).

In the case of the MLMC, where ensemble members are assumed to be independent, substantial forecast error covariances (i.e., off-diagonal elements in  $P^f$ ) are not expected. Therefore, it is essential to investigate the causes of negative eigenvalues.

L406-407: Please use the terminology of “nature run” and specify the method to generate the observations (e.g. adding random noises).

L407: The authors mentioned 'use the same model to run the multi-level ensemble.' However, the system setting such as horizontal resolution and initial conditions should differ among multi-level forecasts. Please correct the description to accurately reflect the different system settings for each level.

[Subsection 4.1.1]

L420: The authors prescribed constant Coriolis parameter  $f$  (i.e.,  $f$ -plane), and it is necessary to clarify the assumption the authors made. Furthermore, please specify the latitude corresponding to the prescribed  $f$ .

In addition to providing the grid size, it would be beneficial to include information on the horizontal resolution to understand the model configuration.

To ensure scientific reproducibility, it is essential to include detailed information on the resolution of both the coarser and coarsest models in the description of the model configuration.

The information provided on the method to generate the initial conditions of sea surface height is insufficient. Additionally, it is crucial to ensure that the initial conditions for the nature and forecast runs are different. If this condition is not met, the authors would be assuming an unrealistic situation in which the authors can obtain true values. Please provide more details on the method for generating the initial conditions of sea surface height and confirm the differences in the initial conditions between the nature and forecast run.

L430: It is essential to specify the method to generate model errors in this study. Typically, model errors are not substantial in twin experiments, as they result from imperfect factors in models as well as tangent linear and ensemble approximations in the KF and EnKF, respectively. If model errors are large enough to generate chaotic flows, the shallow-water model employed in this study is meant to not accurately represent spatiotemporal oceanic variations. Therefore, it is necessary to provide reasonable experimental settings, particularly regarding model errors.

The authors described that the shallow-water model behaves chaotically in Line 431. However, it is confirmed that the model without model errors and unique external forcing is less chaotic using the Lyapunov exponent. Although the current field appears to be chaotic at the initial stage of the experiment, attractors are likely to converge to a certain condition over time. Therefore, the experimental period of about 10 days would be too short to evaluate statistical indicators such as accuracy and ensemble spread. It is essential to conduct data assimilation experiments for a longer period over 1 month (might be over 1 year?) to show statistically significant results.

[Subsection 4.1.3]

Zonal and Meridional momentums ( $h_u$  and  $h_v$ , respectively) correspond to the vertical integration of zonal and meridional velocities in the 3D ocean and cannot be observed. This is inconsistent with the aim of this study to develop MLDA for practical systems. In addition, operational systems do not assimilate current data as shown in the review papers (Balmaseda et al. 2015; Martin et al. 2015). Therefore, it is necessary to provide consistent descriptions for observation variables to be assimilated in practical applications.

Standard deviations of observation errors prescribed as 0.1 m/s are not consistent with the prescribed observation error covariance matrix  $R=500I$ . It is necessary to provide a clear explanation for the reasons using inconsistent observation errors and observation error matrix in the experimental setting.

Is the chosen localization scale of 50 km optimal? It is required to investigate the optimal localization scale using simple systems to justify the selected scale.

Please specify “relaxation factor of 0.25”. Does this indicate relaxation parameters in relaxation-to-prior perturbation and spread (RTPP and RTPS, respectively; Zhang et al. 2004; Whitaker et al. 2012)?

Fig. 5: No units in the y-axis. There are no blue and red lines.

$v^1$  and  $V^1$  with  $g^2$  appear to represent the variance of variance of a variable. This meaning is unclear, and it is necessary to provide a clear explanation for better understanding.

Table 1: Please provide the details on how to decide the ensemble size for each level. Are the ensemble sizes in Table 1 are the optimal combination?

L487-488: Correlation with what? Similar to what?

L488-489: “as a coarser ... information” is incorrect grammar.

L494:  $h_u$  is dominating what?

L495-496: Please provide a clear explanation of “theoretical error” and “the same function”.

Fig. 6: No units in the axis. “a 3h interval” should be “3 hours”. There are no descriptions of experiments and lines.

Fig. 6: Since the ensemble spread of  $h_u$  and  $h_v$  gradually decreases and is not stable in the assimilation period, it is suggested that the experimental period is not sufficiently long. Extending the assimilation period further would lead to exceedingly small ensemble spread and filter divergence. Slight degradations can be found near the end of the assimilation period. Therefore, it is essential to conduct sufficiently long assimilation experiments and implement schemes to avoid filter divergence.

Furthermore, the accuracy of sea surface height is better in the ML experiments than the SL experiment, but this is not clear for  $h_u$  and  $h_v$ , especially  $h_v$ . This is inconsistent because the sea surface height is directly linked with the current in the shallow water model. Therefore, it is crucial to investigate the cause of the inconsistency.

[subsection 4.3.1]

Eq. (28): The state variable  $x$  includes three variables with different units, and therefore Eq. (28) is inconsistent. Instead, it would be more appropriate to calculate RMSEs for

each variable.

L516-517: Not clear. Please provide a clear explanation.

L529–530: The authors described that the computation cost of the system is expensive. However, if high-performance and parallel computing are used, the cost of an LETKF-based shallow-water data assimilation system would not be expensive since the model is 2D.

L531-532: Even in the coarse system with 275 ensemble members, the localization would be necessary because of the presence of substantial sampling errors. Therefore, it is essential to demonstrate that the ensemble size of 275 is sufficient to reduce the spurious correlations.

[subsection 4.3.2]

Line 542: Please indicate a specific section of the discussion of the difference between MLDA and MLMC.

It is necessary to describe the meaning of  $V^1/v^1$  to clarify the discussion in subsection 4.3.2.

[subsection 4.3.3]

The experiments conducted in this study should be summarized in the Method Section.

Please provide a clear explanation of “truth’s function value” in Line 562, “true observation value” in Line 563-564, and “the indicator function” in Line 567.

[subsection 5.1]

It is more natural to use analysis velocity estimated from Eq. (30) than Eq. (31) because Eq. (31) results in the analysis velocity with positive biases. Although the authors seem to provide the reasons not to adopt Eq. (30) in the third paragraph, these reasons are not entirely clear. Therefore, it is necessary to describe the reasons more carefully and specifically.

Please provide a clear explanation of “prediction of the true drifter” in L623-624 and “ensemble calibration” in Line 627.

Equation (32) represents error variance, not error. Please provide appropriate expression.

Fig. 11: No label and unit in the y-axis.

The forecast accuracy of the trajectory is better in the SL experiment than in the ML experiment (Fig. 11), whereas that of the current shows no substantial differences between the SL and ML experiments (Fig. 6). Therefore, it is necessary to investigate the cause of the better trajectory accuracy in the SL experiment.

[Section 6]

To demonstrate that the accuracy in the single-level experiment is almost the same as in the multi-level experiments, it is essential to apply statistical tests to investigate the significant differences among the sensitivity experiments.

**Technical corrections:**

It is imperative to convey information with scientific precision, providing clear and objective descriptions in international journals. However, upon reviewing this paper, I have identified numerous instances of ambiguous expressions, typos, incorrect grammar, and a lack of definitions for words and mathematical symbols as listed. It is crucial for the authors to meticulously refine the manuscript. I express concern that the current state of the paper might not meet the standards for the review process. It seems plausible that co-authors may not have thoroughly checked the manuscript. It is strongly recommended to consider engaging the services of professional English editing to ensure the manuscript meets the requisite standards for publication.

L16: Please specify “By harnessing ... within the ensemble”.

L18: Please specify “the different levels”. Which levels did the authors indicate accuracy, resolution, or vertical levels?

L22: Do “partial observations” indicate sparse observations? If so, please correct it with “sparse” throughout the manuscript.

L22: What does “the system” stand for? Please describe specifically.

L22-23: “work” should be “works”, and “has” should be “have”.

L23: Please describe specifically “potential gains”.

L24: “distinguish” should be “distinguishes”.

L28-29: “generalized circulation model” should be “general circulation models” or “Ocean general circulation models”.

L30-31: “input fields” should be “ocean current data”, and “a deterministic ... at best” should be “deterministic or small ensemble forecasts”.

L31: “one has suggested” should be “Roed (2012) suggested”.

L31-33: “larger” is not appropriate because this sentence does not include a target to

compare.

L32-33: It appears to duplicate the meaning of “to investigate ... ocean currents” and “quantify ... trajectories”.

L35: Remove “apply and”.

L36: “running ensembles” should be “conducting ensemble forecasts” or “conducting ensemble simulations”.

L41: Remove “run”.

L42: Please specify “run time scaling”.

L44: “others” should be “other”.

L47: “equivalent ... ensembles” should be “traditional single-level data assimilation methods”.

L51-52: Duplicate the meaning of “For uncertainty quantification” and “for the estimation of expected values”.

L53: Remove “by”.

L53: “telescopic sum” might be “telescoping sum”.

L55: Please specify “budget”.

L57: “case” should be “cases”.

L61: “The nature of the methods” should be “The kinds of ensemble data assimilation methods”. Remove “commonly split into”.

L62: “filters” should be “filter”.

L64-65: Incorrect grammar.

L66: “ensemble member” should be “particle”.

L81: Please specify what “a particular challenging test case” is and why “challenging” is.

L82: Insert “will demonstrate to” between “work” and “bring”.

L84: Please specify “robust”.

L85: Please specify “Among others”.

L85: “work with” should be “make”

L86: “work” should be “works”.

L86: If “it” indicates “the assumption”, “it” should be “they”.

L88: Please specify “opposing jets”.

L89: “state estimation quality” should be “accuracy”, and remove “of corresponding theoretical error”.

L102: “representation of the same system” should be “model”.

L105: Remove “term”.

L118: “isolated model time step” would be “analysis time steps”.

L131: No definition of “N” in  $x_e$ .

L136: “ensemble anomalies” should be “ensemble perturbations”.

L136: “covariance” should be “error covariance matrix”.

L141: “comma” should be “and”.



L166: “Monte Carlo variability” should be “sampling error”.

L194: “model perturbations” should be “model errors”.

L222: Remove “it takes”.

L237: “Given ...  $\{C_1\}^{L_{l=0}}$ ” should have the form of “A, B, and C”.

L240 “in” should be “to”.

L280: “standard deviation” should be “spread”.

L280: “are” might be “is”.

L280: Please specify “robust statement”.

L282: Please specify “Assessment scores”

L303: Please insert “size” between “large” and “problem”.

L310 and others: “best” should be “the best”.

L319: It is not good to cite something that comes later.

L323-324: Incorrect grammar.

L326: “foe” should be “for”.

L340: “N” should be “N<sup>l</sup>”.

L359: “analyzed for” should be “applied to”.

L381: Please check the spell of “assemblance”.

L392: “that” should be “than”.

L406: Replace “spread” with “ensemble spread” and remove “around the mean”.

L418-419: Please add “, respectively” at the end of the sentence.

Axis in Fig. 4: “Velocity” should be “Speed”.

Line 453: “3d” should be “3 days”. This is true for the similar expressions throughout the manuscripts.

L483: “is” should be “are”.

L528: Please specify “the curves”.

L533: “but” should be “except for”.

L543: “that” should be “the”.

Please specify the meaning of “directly” in Line 581.

Incorrect grammar in L635-637 and L638-639.

Please specify “the devil” in Line 660.

Line 672: “assimilation” should be “analysis”.

## References:

- Balmaseda, M.A., Hernandez, F., Storto, A., Palmer, M.D., Alves, O., Shi, L., Smith, G.C., Toyoda, T., Valdivieso, M., Barnier, B., Behringer, D., Boyer, T., Chang, Y.S., Chepurin, G.A., Ferry, N., Forget, G., Fujii, Y., Good, S., Guinehut, S., Haines, K., Ishikawa, Y., Keeley, S., Köhl, A., Lee, T., Martin, M.J., Masina, S., Masuda, S., Meyssignac, B., Mogensen, K., Parent, L., Peterson, K.A., Tang, Y.M., Yin, Y., Vernieres, G., Wang, X., Waters, J., Wedd, R., Wang, O., Xue, Y., Chevallier, M., Lemieux, J.F., Dupont, F., Kuragano, T., Kamachi, M., Awaji, T., Caltabiano, A., Wilmer-Becker, K., Gaillard, F., 2015. The ocean reanalyses intercomparison project (ORA-IP). *J. Oper. Oceanogr.* 8, s80–s97.
- Martin, M.J., Balmaseda, M., Bertino, L., Brasseur, P., Brassington, G., Cummings, J., Fujii, Y., Lea, D.J., Lellouche, J.M., Mogensen, K., Oke, P.R., Smith, G.C., Testut, C.E., Waagbø, G.A., Waters, J., Weaver, A.T., 2015. Status and future of data assimilation in operational oceanography. *J. Oper. Oceanogr.* 8, s28–s48.
- Kondo, K., Miyoshi, T., 2016. Impact of removing covariance localization in an ensemble Kalman Filter: Experiments with 10 240 members using an intermediate AGCM. *Mon. Weather Rev.* 144, 4849–4865.
- Fukumori, I., Malanotte-Rizzoli, P., 1995. An approximate Kalman filter for ocean data assimilation: An example with an idealized Gulf Stream model. *J. Geophys. Res.* 100, 6777.
- Hunt, B.R., Kostelich, E.J., Szunyogh, I., 2007. Efficient data assimilation for spatiotemporal chaos: A local ensemble transform Kalman filter. *Phys. D* 230, 112–126.
- Weston, P.P., Bell, W., Eyre, J.R., 2014. Accounting for correlated error in the assimilation of high-resolution sounder data. *Q. J. R. Meteorol. Soc.* 140, 2420–2429.
- Tabeart, J.M., Dance, S.L., Lawless, A.S., Nichols, N.K., Waller, J.A., 2020. Improving the condition number of estimated covariance matrices. *Tellus, Ser. A Dyn. Meteorol. Oceanogr.* 72, 1–19.

Zhang, F., Snyder, C., Sun, J., 2004. Impacts of initial estimate and observation availability on convective-scale data assimilation with an ensemble Kalman filter. *Mon. Weather Rev.* 132, 1238–1253.

Whitaker, J.S., Hamill, T.M., 2012. Evaluating methods to account for system errors in ensemble data assimilation. *Mon. Weather Rev.* 140, 3078–3089.
